# Supplementary material
Source: ML conference proceedings conference paper supplement (https://proceedings.mlr.press/v32/yib14.html)
Supplement: Supplementary file 1 [file yib14-supp.pdf]

---

# Supplementary Material: A Single-Pass Algorithm for Efficiently Recovering Sparse Cluster Centers of High-dimensional Data

---

**Jinfeng Yi**

JINFENGY@US.IBM.COM

IBM Thomas J. Watson Research Center, Yorktown Heights, NY 10598, USA

**Lijun Zhang**

ZHANGLJ@LAMDA.NJU.EDU.CN

National Key Laboratory for Novel Software Technology, Nanjing University, Nanjing 210023, China

**Jun Wang**

WANGJUN@US.IBM.COM

IBM Thomas J. Watson Research Center, Yorktown Heights, NY 10598, USA

**Rong Jin**

RONGJIN@CSE.MSU.EDU

**Anil K. Jain**

JAIN@CSE.MSU.EDU

Department of Computer Science and Engineering, Michigan State University, East Lansing, MI 48824 USA

**Theorem 1.** *Let  $\epsilon \leq 1/(6m)$  be a parameter to control the success probability. Assume*

$$\Delta_* \leq \Delta^1 \leq \Delta_{\max}, \quad (1)$$

$$\frac{\Delta^1}{2\sqrt{2s}} \leq \lambda^1 \leq c \frac{\Delta^1}{2\sqrt{2s}}, \quad (2)$$

$$T \geq \max \left( \frac{18}{\mu_0} \ln \frac{2K}{\epsilon}, \frac{3c_2\eta_0}{\lambda^1}, \left( \frac{6c_3\sigma}{\lambda^1} \right)^2 (\ln n + \ln d) \right) \quad (3)$$

where  $c$ ,  $c_2$  and  $c_3$  are some universal constants. Then, with a probability at least  $1 - 6m\epsilon$ , we have

$$\Delta^{m+1} = \max_{1 \leq i \leq K} \|\hat{\mathbf{c}}_i^{m+1} - \mathbf{c}_i\| \leq \max \left( \Delta_*, \frac{c\Delta^1}{\sqrt{2^m}} \right).$$

**Corollary 1.** *The convergence rate for  $\Delta$ , the maximum difference between the optimal cluster centers and the estimated ones, is  $O(\sqrt{(s \log d)/n})$  before reaching the optimal difference  $\Delta_*$ .*

## 1. Proof of Corollary 1

According to the assumption of  $\lambda^1$  in (2), we know that  $\frac{1}{\lambda^1} \propto \frac{\sqrt{s}}{\Delta^1}$ . Since the value of  $T$  is dominated by the last term in the right side of (3), we have  $T \propto \frac{s \log d}{\Delta^1 \cdot \Delta^1}$ , which implies

$$n \propto 2^m T \propto 2^m \frac{s \log d}{\Delta^1 \cdot \Delta^1}.$$

Combining with the conclusion  $\Delta_{m+1} \propto \frac{\Delta^1}{\sqrt{2^m}}$ , we have

$$\Delta_{m+1} \propto \sqrt{\frac{s \log d}{n}}.$$

**Lemma 1.** Let  $\Delta^t$  be the maximum difference between the optimal cluster centers and the ones estimated from iteration  $t$ , and  $\epsilon \in (0, 1)$  be the failure probability. Assume

$$\Delta^t \leq \frac{1-\rho}{2} - \sigma \sqrt{5 \ln(3K)} \triangleq \Delta_{\max}, \quad (4)$$

$$|\mathcal{S}^t| \geq \frac{18}{\mu_0} \ln \frac{2K}{\epsilon}, \quad (5)$$

$$\lambda^t \geq c_1 \exp\left(-\frac{(1-2\Delta^t-\rho)^2}{8(1+\Delta^t)^2\sigma^2}\right) (\eta_0 + \sigma \sqrt{\ln |\mathcal{S}^t|}) + \frac{c_2 \eta_0}{|\mathcal{S}^t|} + c_3 \sigma \frac{\sqrt{\ln |\mathcal{S}^t|} + \sqrt{\ln d}}{\sqrt{|\mathcal{S}^t|}}, \quad (6)$$

for some constants  $c_1, c_2$  and  $c_3$ . Then with a probability  $1 - 6\epsilon$ , we have

$$\Delta^{t+1} \leq 2\sqrt{s}\lambda^t.$$

## 2. Proof of Lemma 1

For the simplicity of analysis, we will drop the superscript  $t$  through this analysis.

### 2.1. Preliminaries

We denote by  $\mathcal{C}_k$  the support of  $\mathbf{c}_k$  and  $\bar{\mathcal{C}}_k = [d] \setminus \mathcal{C}_k$ . For any vector  $\mathbf{z}$ ,  $\mathbf{z}(\mathcal{C})$  is defined as  $[\mathbf{z}(\mathcal{C})]_i = z_i$  if  $i \in \mathcal{C}$  and zero, otherwise.

For any  $\mathbf{x}_i \in \mathcal{S}$ , we use  $k_i$  to denote the index of the true cluster, and  $\hat{k}_i$  to denote index of the cluster assigned by the nearest neighbor search, i.e.,

$$\begin{aligned} \mathbf{x}_i &= \mathbf{c}_{k_i} + \mathbf{g}_i \text{ and } \mathbf{g}_i \sim N(0, \sigma^2 I), \\ \hat{k}_i &= \arg \max_{j \in [K]} \hat{\mathbf{c}}_j^\top \mathbf{x}_i. \end{aligned}$$

Then, we can partition data points in  $\mathcal{S}$  based on either the ground truth or the assigned cluster. Let  $\mathcal{S}_k$  be the subset of data points in  $\mathcal{S}$  that belong to the  $k$ -th cluster, i.e.,

$$\mathcal{S}_k = \{\mathbf{x}_i \in \mathcal{S} : \mathbf{x}_i = \mathbf{c}_k + \mathbf{g}_i \text{ and } \mathbf{g}_i \sim N(0, \sigma^2 I)\} \quad (7)$$

Let  $\hat{\mathcal{S}}_k$  be the subset of data points that are assigned to the  $k$ -th cluster based on the nearest neighbor search, i.e.,

$$\hat{\mathcal{S}}_k = \{\mathbf{x}_i \in \mathcal{S} : k = \arg \max_{j \in [K]} \hat{\mathbf{c}}_j^\top \mathbf{x}_i\} \quad (8)$$

### 2.2. The Main Analysis

Let  $\mathcal{L}_k(\mathbf{c})$  be the objective function in Step 11 of Algorithm 1. We expand  $\mathcal{L}_k(\mathbf{c})$  as

$$\begin{aligned} \mathcal{L}_k(\mathbf{c}) &= \lambda \|\mathbf{c}\|_1 + \|\mathbf{c} - \mathbf{c}_k\|^2 + \frac{1}{|\hat{\mathcal{S}}_k|} \sum_{\mathbf{x}_i \in \hat{\mathcal{S}}_k} \|\mathbf{x}_i - \mathbf{c}_k\|^2 - \frac{2}{|\hat{\mathcal{S}}_k|} \sum_{\mathbf{x}_i \in \hat{\mathcal{S}}_k} (\mathbf{c} - \mathbf{c}_k)^\top (\mathbf{x}_i - \mathbf{c}_k) \\ &= \lambda \|\mathbf{c}\|_1 + \|\mathbf{c} - \mathbf{c}_k\|^2 + \frac{1}{|\hat{\mathcal{S}}_k|} \sum_{\mathbf{x}_i \in \hat{\mathcal{S}}_k} \|\mathbf{x}_i - \mathbf{c}_k\|^2 \\ &\quad - 2(\mathbf{c} - \mathbf{c}_k)^\top \underbrace{\frac{1}{|\hat{\mathcal{S}}_k|} \sum_{\mathbf{x}_i \in \hat{\mathcal{S}}_k \setminus \mathcal{S}_k} (\mathbf{c}_{k_i} - \mathbf{c}_k)}_{A_k} - 2(\mathbf{c} - \mathbf{c}_k)^\top \underbrace{\frac{1}{|\hat{\mathcal{S}}_k|} \sum_{\mathbf{x}_i \in \hat{\mathcal{S}}_k} \mathbf{g}_i}_{B_k}. \end{aligned} \quad (9)$$

Let  $\mathbf{c}_k^*$  be the optimal solution that minimizes  $\mathcal{L}_k(\mathbf{c})$ , and define  $\mathbf{f}_k = \mathbf{c}_k^* - \mathbf{c}_k$ . We have

$$\begin{aligned}
 & \mathcal{L}_k(\mathbf{c}_k^*) - \mathcal{L}_k(\mathbf{c}_k) \\
 &= \lambda \|\mathbf{f}_k + \mathbf{c}_k\|_1 + \|\mathbf{f}_k\|^2 - 2\mathbf{f}_k^\top A_k - 2\mathbf{f}_k^\top B_k - \lambda \|\mathbf{c}_k\|_1 \\
 &\geq \lambda \|\mathbf{c}_k\|_1 - \lambda \|\mathbf{f}_k(\mathcal{C}_k)\|_1 + \lambda \|\mathbf{f}_k(\bar{\mathcal{C}}_k)\|_1 + \|\mathbf{f}_k\|^2 - 2\mathbf{f}_k^\top A_k - 2\mathbf{f}_k^\top B_k - \lambda \|\mathbf{c}_k\|_1 \\
 &\geq -\lambda \|\mathbf{f}_k(\mathcal{C}_k)\|_1 + \lambda \|\mathbf{f}_k(\bar{\mathcal{C}}_k)\|_1 + \|\mathbf{f}_k\|^2 - 2\|\mathbf{f}_k\|_1 \|A_k\|_\infty - 2\|\mathbf{f}_k\|_1 \|B_k\|_\infty \\
 &= -(\lambda + 2\|A_k\|_\infty + 2\|B_k\|_\infty) \|\mathbf{f}_k(\mathcal{C}_k)\|_1 + (\lambda - 2\|A_k\|_\infty - 2\|B_k\|_\infty) \|\mathbf{f}_k(\bar{\mathcal{C}}_k)\|_1 + \|\mathbf{f}_k\|^2 \\
 &\geq -\sqrt{|\mathcal{C}_k|} (\lambda + 2\|A_k\|_\infty + 2\|B_k\|_\infty) \|\mathbf{f}_k(\mathcal{C}_k)\| + (\lambda - 2\|A_k\|_\infty - 2\|B_k\|_\infty) \|\mathbf{f}_k(\bar{\mathcal{C}}_k)\|_1 + \|\mathbf{f}_k\|^2.
 \end{aligned}$$

Thus, if

$$\lambda \geq 2\|A_k\|_\infty + 2\|B_k\|_\infty,$$

we have

$$\|\mathbf{f}_k(\mathcal{C}_k)\|^2 \leq \|\mathbf{f}_k\|^2 \leq (\lambda + 2\|A_k\|_\infty + 2\|B_k\|_\infty) \sqrt{|\mathcal{C}_k|} \|\mathbf{f}_k(\mathcal{C}_k)\| \leq 2\lambda \sqrt{|\mathcal{C}_k|} \|\mathbf{f}_k(\mathcal{C}_k)\| \Rightarrow \|\mathbf{f}_k(\mathcal{C}_k)\| \leq 2\lambda \sqrt{|\mathcal{C}_k|},$$

and thus

$$\|\mathbf{f}_k\|^2 \leq 2\lambda \sqrt{|\mathcal{C}_k|} \|\mathbf{f}_k(\mathcal{C}_k)\| \leq 4\lambda^2 |\mathcal{C}_k| \Rightarrow \|\mathbf{f}_k\| \leq 2\lambda \sqrt{|\mathcal{C}_k|}.$$

In summary, if

$$\lambda \geq 2\|A_k\|_\infty + 2\|B_k\|_\infty, \forall k \in [K]$$

we have

$$\max_{1 \leq k \leq K} \|\mathbf{c}_k^* - \mathbf{c}_k\| \leq 2\sqrt{s}\lambda.$$

In the following, we discuss how to bound  $\|A_k\|_\infty$  and  $\|B_k\|_\infty$ .

### 2.3. Bound for $\|A_k\|_\infty$

From the definition of  $A_k$  in (9), we have

$$\|A_k\|_\infty \leq 2\eta_0 \frac{|\widehat{\mathcal{S}}_k \setminus \mathcal{S}_k|}{|\widehat{\mathcal{S}}_k|}.$$

#### 2.3.1. LOWER BOUND OF $|\widehat{\mathcal{S}}_k|$

First, we show that the size of  $\mathcal{S}_k$  is lower-bounded, which means a significant amount of data points in  $S$  belong to the  $k$ -th cluster. Recall that  $\mu_1, \dots, \mu_K$  are the weight of the Gaussian mixtures, and  $\mu_0 = \min_{1 \leq i \leq K} \mu_i$ . According to the Chernoff bound (Angluin & Valiant, 1979) provided in Appendix A, we have, with a probability at least  $1 - \epsilon$

$$|\mathcal{S}_k| \geq \mu_k |\mathcal{S}| \left( 1 - \sqrt{\frac{2}{\mu_k |\mathcal{S}|} \ln \frac{K}{\epsilon}} \right) \stackrel{(5)}{\geq} \frac{2}{3} \mu_k |\mathcal{S}|, \forall k \in [K]. \quad (10)$$

Next, we prove that a larger amount of data points in  $\mathcal{S}_k$  belong to  $\widehat{\mathcal{S}}_k$ . We begin by analyzing the probability that the assigned cluster  $\widehat{k}_i$  of  $\mathbf{x}_i$  is the true cluster  $k_i$ . The similarity between  $\mathbf{x}_i$  and the estimated cluster centers can be bounded by

$$\begin{aligned}
 \widehat{\mathbf{c}}_{k_i}^\top \mathbf{x}_i &= \widehat{\mathbf{c}}_{k_i}^\top (\mathbf{c}_{k_i} + \mathbf{g}_i) = \|\mathbf{c}_{k_i}\|^2 + [\widehat{\mathbf{c}}_{k_i} - \mathbf{c}_{k_i}]^\top \mathbf{c}_{k_i} + \widehat{\mathbf{c}}_{k_i}^\top \mathbf{g}_i \\
 &\geq 1 - \|\widehat{\mathbf{c}}_{k_i} - \mathbf{c}_{k_i}\| - |\widehat{\mathbf{c}}_{k_i}^\top \mathbf{g}_i| \geq 1 - \Delta - (1 + \Delta) \left| \mathbf{g}_i^\top \frac{\widehat{\mathbf{c}}_{k_i}}{\|\widehat{\mathbf{c}}_{k_i}\|} \right|, \\
 \widehat{\mathbf{c}}_j^\top \mathbf{x}_i &= \widehat{\mathbf{c}}_j^\top (\mathbf{c}_{k_i} + \mathbf{g}_i) = \mathbf{c}_j^\top \mathbf{c}_{k_i} + [\widehat{\mathbf{c}}_j - \mathbf{c}_j]^\top \mathbf{c}_{k_i} + \widehat{\mathbf{c}}_j^\top \mathbf{g}_i \\
 &\leq \rho + \|\widehat{\mathbf{c}}_j - \mathbf{c}_j\| + |\widehat{\mathbf{c}}_j^\top \mathbf{g}_i| \leq \rho + \Delta + (1 + \Delta) \left| \mathbf{g}_i^\top \frac{\widehat{\mathbf{c}}_j}{\|\widehat{\mathbf{c}}_j\|} \right|, \quad j \neq k_i.
 \end{aligned}$$

Hence,  $\mathbf{x}_i$  will be assigned to cluster  $k_i$  if

$$1 - \Delta - (1 + \Delta) \left| \mathbf{g}_i^\top \frac{\widehat{\mathbf{c}}_{k_i}}{\|\widehat{\mathbf{c}}_{k_i}\|} \right| \geq \rho + \Delta + (1 + \Delta) \left| \mathbf{g}_i^\top \frac{\widehat{\mathbf{c}}_j}{\|\widehat{\mathbf{c}}_j\|} \right|, \quad \forall j \neq k_i,$$

which leads to the following sufficient condition

$$\max_{1 \leq j \leq K} \left| \mathbf{g}_i^\top \frac{\widehat{\mathbf{c}}_j}{\|\widehat{\mathbf{c}}_j\|} \right| \leq \frac{1 - 2\Delta - \rho}{2(1 + \Delta)} \triangleq g_0 \stackrel{(4)}{\geq} \frac{2\sigma\sqrt{5\ln(3K)}}{3} \geq \sigma\sqrt{2\ln(3K)}. \quad (11)$$

It is easy to verify that for any fixed direction  $\widehat{\mathbf{c}}$  with  $\|\widehat{\mathbf{c}}\| = 1$ ,  $\mathbf{g}_i^\top \widehat{\mathbf{c}}$  is a Gaussian random variable with mean 0 and variance  $\sigma^2$ . Based on the tail bound for the Gaussian distribution (Chang et al., 2011) provided in Appendix B, we have

$$\Pr \left[ \max_{1 \leq j \leq K} \left| \mathbf{g}_i^\top \frac{\widehat{\mathbf{c}}_j}{\|\widehat{\mathbf{c}}_j\|} \right| \leq g_0 \right] \geq 1 - K \exp\left(-\frac{g_0^2}{2\sigma^2}\right).$$

Define

$$\delta = K \exp\left(-\frac{g_0^2}{2\sigma^2}\right) \stackrel{(11)}{\leq} \frac{1}{3}. \quad (12)$$

In summary, we have proved the following lemma.

**Lemma 2.** *Under the condition in (4), with a probability at least  $1 - \delta$ ,  $\mathbf{x}_i = \mathbf{c}_{k_i} + \mathbf{g}_i \in \mathcal{S}_{k_i} \subset \mathcal{S}$  satisfies*

$$\max_{1 \leq j \leq K} \left| \mathbf{g}_i^\top \frac{\widehat{\mathbf{c}}_j}{\|\widehat{\mathbf{c}}_j\|} \right| \leq g_0,$$

and is assigned to the correct cluster  $k_i$  based on the nearest neighbor search (i.e.,  $\widehat{k}_i = k_i$ ).

Define

$$\mathcal{S}_k^1 = \left\{ \mathbf{x}_i \in \mathcal{S}_k : \max_{1 \leq j \leq K} \left| \mathbf{g}_i^\top \frac{\widehat{\mathbf{c}}_j}{\|\widehat{\mathbf{c}}_j\|} \right| \leq g_0 \right\} \subset \widehat{\mathcal{S}}_k \cap \mathcal{S}_k. \quad (13)$$

Since each data point in  $\mathcal{S}_k$  has a probability at least  $1 - \delta$  to be assigned to set  $\mathcal{S}_k^1$ , using the Chernoff bound again, we have, with a probability at least  $1 - \epsilon$ ,

$$\begin{aligned} |\widehat{\mathcal{S}}_k| &\geq |\widehat{\mathcal{S}}_k \cap \mathcal{S}_k| \geq |\mathcal{S}_k^1| \geq \mathbb{E}[|\mathcal{S}_k^1|] \left(1 - \sqrt{\frac{2}{\mathbb{E}[|\mathcal{S}_k^1|]} \ln \frac{K}{\epsilon}}\right) \\ &\geq (1 - \delta) |\mathcal{S}_k| \left(1 - \sqrt{\frac{2}{(1 - \delta) |\mathcal{S}_k|} \ln \frac{K}{\epsilon}}\right) \\ &\stackrel{(12)}{\geq} \frac{2}{3} |\mathcal{S}_k| \left(1 - \sqrt{\frac{3}{|\mathcal{S}_k|} \ln \frac{K}{\epsilon}}\right) \stackrel{(5), (10)}{\geq} \frac{1}{3} |\mathcal{S}_k|, \quad \forall k \in [K]. \end{aligned} \quad (14)$$

### 2.3.2. UPPER BOUND OF $|\widehat{\mathcal{S}}_k \setminus \mathcal{S}_k|$

Define

$$\mathcal{O} = \cup_{k=1}^K \mathcal{S}_k^1 \subset \mathcal{S} \text{ and } \overline{\mathcal{O}} = \cup_{k=1}^K (\widehat{\mathcal{S}}_k \setminus \mathcal{S}_k^1) = \mathcal{S} \setminus \mathcal{O} \subset \mathcal{S}.$$

From Lemma 2, we know that with a probability at least  $1 - \delta$ , each  $\mathbf{x}_i \in \mathcal{S}_k$  belongs to the set  $\mathcal{S}_k^1 \subset \mathcal{O}$ . Thus, with probability at least  $1 - \delta$ , each  $\mathbf{x}_i \in \mathcal{S}$  belongs to  $\mathcal{O}$ . In other words, with probability *at most*  $\delta$ , each  $\mathbf{x}_i \in \mathcal{S}$  belongs to  $\overline{\mathcal{O}}$ . Based on the Chernoff bound, we have, with a probability at least  $1 - \epsilon$ ,

$$|\overline{\mathcal{O}}| \leq 2\mathbb{E}[|\overline{\mathcal{O}}|] + 2 \ln \frac{1}{\epsilon} \leq 2\delta |\mathcal{S}| + 2 \ln \frac{1}{\epsilon}. \quad (15)$$

Since  $\mathcal{S}_k^1 \subset \mathcal{S}_k$ , we have  $\widehat{\mathcal{S}}_k \setminus \mathcal{S}_k \subset \widehat{\mathcal{S}}_k \setminus \mathcal{S}_k^1 \subset \overline{\mathcal{O}}$ . Therefore, with a probability at least  $1 - \epsilon$ , we have

$$|\widehat{\mathcal{S}}_k \setminus \mathcal{S}_k| \leq 2\delta |\mathcal{S}| + 2 \ln \frac{1}{\epsilon}, \quad \forall k \in [K]. \quad (16)$$

Combining (10), (14) and (16), we have, with probability at least  $1 - 3\epsilon$

$$\|A_k\|_\infty \leq 2\eta_0 \frac{2\delta|\mathcal{S}| + 2\ln \frac{1}{\epsilon}}{\frac{2}{9}\mu_k|\mathcal{S}|} = \frac{18\eta_0}{\mu_k} \left( \delta + \frac{1}{|\mathcal{S}|} \ln \frac{1}{\epsilon} \right) = O(\delta\eta_0) + O\left(\frac{\eta_0}{|\mathcal{S}|}\right), \forall k \in [K]. \quad (17)$$

#### 2.4. Bound for $\|B_k\|_\infty$

Notice that  $\{\mathbf{g}_i : \mathbf{x}_i \in \widehat{\mathcal{S}}_k\}$ , determined by the estimated centers  $\widehat{\mathbf{c}}_1, \dots, \widehat{\mathbf{c}}_K$ , is a specific subset of  $\{\mathbf{g}_i : \mathbf{x}_i \in \mathcal{S}\}$ . Although  $\mathbf{g}_i$  is drawn from the Gaussian distribution  $N(0, \sigma^2 I)$ , the distribution of elements in  $\{\mathbf{g}_i : \mathbf{x}_i \in \widehat{\mathcal{S}}_k\}$  is unknown. As a result, we cannot direct apply concentration inequality of Gaussian random vectors to bound  $\|B_k\|_\infty$ . Let  $U_1 \in \mathbb{R}^{d \times K}$  be a matrix whose columns are basis vectors of the subspace spanned by  $\widehat{\mathbf{c}}_1, \dots, \widehat{\mathbf{c}}_K$ , and  $U_2 \in \mathbb{R}^{d \times (d-K)}$  be a matrix whose columns are basis vectors of the complementary subspace. We then divide each  $\mathbf{g}_i$  as

$$\mathbf{g}_i = \mathbf{g}_i^\parallel + \mathbf{g}_i^\perp,$$

where  $\mathbf{g}_i^\parallel = U_1 U_1^\top \mathbf{g}_i$ , and  $\mathbf{g}_i^\perp = U_2 U_2^\top \mathbf{g}_i$ .

First, we upper bound  $\|B_k\|_\infty$  as

$$\|B_k\|_\infty \leq \underbrace{\left\| \frac{1}{|\widehat{\mathcal{S}}_k|} \sum_{\mathbf{x}_i \in \widehat{\mathcal{S}}_k} \mathbf{g}_i^\perp \right\|_\infty}_{\widehat{B}_k^1} + \underbrace{\left\| \frac{|\widehat{\mathcal{S}}_k \setminus \mathcal{S}_k^1|}{|\widehat{\mathcal{S}}_k|} \left\| \frac{1}{|\widehat{\mathcal{S}}_k \setminus \mathcal{S}_k^1|} \sum_{\mathbf{x}_i \in \widehat{\mathcal{S}}_k \setminus \mathcal{S}_k^1} \mathbf{g}_i^\parallel \right\|_\infty \right\|}_{\widehat{B}_k^2} + \underbrace{\left\| \frac{|\mathcal{S}_k^1|}{|\widehat{\mathcal{S}}_k|} \left\| \frac{1}{|\mathcal{S}_k^1|} \sum_{\mathbf{x}_i \in \mathcal{S}_k^1} \mathbf{g}_i^\parallel \right\|_\infty \right\|}_{\widehat{B}_k^3}. \quad (18)$$

In the following, we discuss how to bound each term in the right hand side of (18).

##### 2.4.1. UPPER BOUND OF $\widehat{B}_k^1$

Following the property of Gaussian random vector,  $\sum_{\mathbf{x}_i \in \widehat{\mathcal{S}}_k} U_2^\top \mathbf{g}_i / \left( \sigma \sqrt{|\widehat{\mathcal{S}}_k|} \right)$  can be treated as a  $(d - K)$ -dimensional Gaussian random vector. As a result, each element of  $U_2 \sum_{\mathbf{x}_i \in \widehat{\mathcal{S}}_k} U_2^\top \mathbf{g}_i / \left( \sigma \sqrt{|\widehat{\mathcal{S}}_k|} \right)$  is a Gaussian random variable with variance smaller than 1. Based on the tail bound for the Gaussian distribution (Chang et al., 2011) provided in Appendix B and the union bound, with a probability at least  $1 - \epsilon$ , we have

$$\left\| \sum_{\mathbf{x}_i \in \widehat{\mathcal{S}}_k} \mathbf{g}_i^\perp / \left( \sigma \sqrt{|\widehat{\mathcal{S}}_k|} \right) \right\|_\infty = \left\| U_2 \sum_{\mathbf{x}_i \in \widehat{\mathcal{S}}_k} U_2^\top \mathbf{g}_i / \left( \sigma \sqrt{|\widehat{\mathcal{S}}_k|} \right) \right\|_\infty \leq \sqrt{2 \ln \frac{Kd}{\epsilon}}, \forall k \in [K],$$

which implies

$$\widehat{B}_k^1 \leq \sigma \sqrt{\frac{2 \ln \frac{Kd}{\epsilon}}{|\widehat{\mathcal{S}}_k|}} \stackrel{(10), (14)}{\leq} \sigma \sqrt{\frac{2 \ln \frac{Kd}{\epsilon}}{2\mu_k|\mathcal{S}|/9}} = O\left(\sigma \sqrt{\frac{\ln d}{|\mathcal{S}|}}\right), \forall k \in [K]. \quad (19)$$

##### 2.4.2. UPPER BOUND OF $\widehat{B}_k^2$

First, we have

$$\left\| \frac{1}{|\widehat{\mathcal{S}}_k \setminus \mathcal{S}_k^1|} \sum_{\mathbf{x}_i \in \widehat{\mathcal{S}}_k \setminus \mathcal{S}_k^1} \mathbf{g}_i^\parallel \right\|_\infty = \left\| \frac{1}{|\widehat{\mathcal{S}}_k \setminus \mathcal{S}_k^1|} \sum_{\mathbf{x}_i \in \widehat{\mathcal{S}}_k \setminus \mathcal{S}_k^1} U_1 U_1^\top \mathbf{g}_i \right\|_\infty \leq \left\| \frac{1}{|\widehat{\mathcal{S}}_k \setminus \mathcal{S}_k^1|} \sum_{\mathbf{x}_i \in \widehat{\mathcal{S}}_k \setminus \mathcal{S}_k^1} U_1^\top \mathbf{g}_i \right\|_\infty \quad (20)$$

Since  $U_1^\top \mathbf{g}_i / \sigma$  can be treated as a  $K$ -dimensional Gaussian random vector, based on the tail bound for the  $\chi^2$  distribution (Laurent & Massart, 2000), we have with a probability at least  $1 - \epsilon$ ,

$$\|U_1^\top \mathbf{g}_i\| \leq \sigma \left( \sqrt{K} + \sqrt{2 \log \frac{1}{\epsilon}} \right)$$

Applying the union bound again, with a probability at least  $1 - \epsilon$ , we have

$$\max_{1 \leq i \leq |\mathcal{S}|} \|U_1^\top \mathbf{g}_i\| \leq \sigma \left( \sqrt{K} + \sqrt{2 \log \frac{|\mathcal{S}|}{\epsilon}} \right) \quad (21)$$

Combining (20) and (21), we have

$$\widehat{B}_k^2 \leq \frac{9\sigma}{\mu_k} \left( \delta + \frac{1}{|\mathcal{S}|} \ln \frac{1}{\epsilon} \right) \left( \sqrt{K} + \sqrt{2 \log \frac{|\mathcal{S}|}{\epsilon}} \right) = O(\delta\sigma\sqrt{\ln|\mathcal{S}|}) + O\left(\sigma \frac{\sqrt{\ln|\mathcal{S}|}}{|\mathcal{S}|}\right), \forall k \in [K]. \quad (22)$$

### 2.4.3. UPPER BOUND OF $\widehat{B}_k^3$

First, we have

$$\left\| \frac{1}{|\mathcal{S}_k^1|} \sum_{\mathbf{x}_i \in \mathcal{S}_k^1} \mathbf{g}_i \right\|_\infty = \left\| U_1 \frac{1}{|\mathcal{S}_k^1|} \sum_{\mathbf{x}_i \in \mathcal{S}_k^1} U_1^\top \mathbf{g}_i \right\|_\infty \leq \left\| \frac{1}{|\mathcal{S}_k^1|} \sum_{\mathbf{x}_i \in \mathcal{S}_k^1} U_1^\top \mathbf{g}_i \right\| := u_k \quad (23)$$

Recall the definition of  $\mathcal{S}_k^1$  in (13). Due to the fact that the domain is symmetric, we have  $\mathbb{E}[U_1^\top \mathbf{g}_i] = 0$ . Under the condition in (21), we can invoke the following lemma to bound  $u_k$ .

**Lemma 3.** (Lemma 2 from (Smale & Zhou, 2007)) *Let  $\mathcal{H}$  be a Hilbert space and  $\xi$  be a random variable on  $(Z, \rho)$  with values in  $\mathcal{H}$ . Assume  $\|\xi\| \leq M < \infty$  almost surely. Denote  $\sigma^2(\xi) = \mathbb{E}(\|\xi\|^2)$ . Let  $\{z_i\}_{i=1}^m$  be independent random drawers of  $\rho$ . For any  $0 < \delta < 1$ , with confidence  $1 - \delta$ ,*

$$\left\| \frac{1}{m} \sum_{i=1}^m (\xi_i - \mathbb{E}[\xi_i]) \right\| \leq \frac{2M \ln(2/\delta)}{m} + \sqrt{\frac{2\sigma^2(\xi) \ln(2/\delta)}{m}}$$

From Lemma 3 and the union bound, with a probability at least  $1 - \epsilon$ , we have

$$u_k \leq \sigma \left( \sqrt{K} + \sqrt{2 \log \frac{|\mathcal{S}|}{\epsilon}} \right) \left( \frac{2 \ln(2K/\epsilon)}{|\mathcal{S}_k^1|} + \sqrt{\frac{2 \ln(2K/\epsilon)}{|\mathcal{S}_k^1|}} \right), \forall k \in [K]. \quad (24)$$

Combining (23) and (24), we have

$$\begin{aligned} \widehat{B}_k^3 &\leq \sigma \left( \sqrt{K} + \sqrt{2 \log \frac{|\mathcal{S}|}{\epsilon}} \right) \left( \frac{2}{|\mathcal{S}_k^1|} \ln \frac{2K}{\epsilon} + \sqrt{\frac{2}{|\mathcal{S}_k^1|} \ln \frac{2K^2}{\epsilon}} \right) \\ &\stackrel{(10), (14), (5)}{\leq} \sigma \left( \sqrt{K} + \sqrt{2 \log \frac{|\mathcal{S}|}{\epsilon}} \right) 2\sqrt{\frac{9}{\mu_k |\mathcal{S}|} \ln \frac{2K}{\epsilon}} = O\left(\sigma \sqrt{\frac{\ln|\mathcal{S}|}{|\mathcal{S}|}}\right), \forall k \in [K]. \end{aligned} \quad (25)$$

In summary, under the condition that (10), (14) and (15) are true, with a probability at least  $1 - 3\epsilon$ ,

$$\|B_k\|_\infty \leq O(\delta\sigma\sqrt{\ln|\mathcal{S}|}) + O\left(\sigma \frac{\sqrt{\ln|\mathcal{S}|} + \sqrt{\ln d}}{\sqrt{|\mathcal{S}|}}\right), \forall k \in [K]. \quad (26)$$

## A. Chernoff Bound

**Theorem 2** (Multiplicative Chernoff Bound (Angluin & Valiant, 1979)). *Let  $X_1, X_2, \dots, X_n$  be independent binary random variables with  $\Pr[X_i = 1] = p_i$ . Denote  $S = \sum_{i=1}^n X_i$  and  $\mu = \mathbb{E}[S] = \sum_{i=1}^n p_i$ . We have*

$$\Pr[S \leq (1 - \epsilon)\mu] \leq \exp\left(-\frac{\epsilon^2}{2}\mu\right), \text{ for } 0 < \epsilon < 1,$$

$$\Pr[S \geq (1 + \epsilon)\mu] \leq \exp\left(-\frac{\epsilon^2}{2 + \epsilon}\mu\right), \text{ for } \epsilon > 0.$$

Therefore,

$$\Pr \left[ S \leq \left( 1 - \sqrt{\frac{2}{\mu} \ln \frac{1}{\delta}} \right) \mu \right] \leq \delta, \text{ for } \exp\left(-\frac{2}{\mu}\right) < \delta < 1,$$

$$\Pr \left[ S \geq 2\mu + 2 \ln \frac{1}{\delta} \geq \left( 1 + \frac{\ln \frac{1}{\delta} + \sqrt{2\mu \ln \frac{1}{\delta}}}{\mu} \right) \mu \right] \leq \delta, \text{ for } 0 < \delta < 1.$$

## B. Tail bounds for the Gaussian distribution

**Theorem 3** (Chernoff-type upper bound for the  $Q$ -function (Chang et al., 2011)). *The  $Q$ -function defined as*

$$Q(x) = \frac{1}{\sqrt{2\pi}} \int_x^\infty \exp\left(-\frac{t^2}{2}\right) dt$$

is the tail probability of the standard Gaussian distribution. When  $x > 0$ , we have

$$Q(x) \leq \frac{1}{2} \exp\left(-\frac{x^2}{2}\right).$$

Let  $X \sim \mathcal{N}(0, 1)$  be a Gaussian random variable. According to Theorem 3, we have

$$\Pr[|X| \geq \epsilon] \leq \exp\left(-\frac{\epsilon^2}{2}\right), \text{ or}$$

$$\Pr\left[|X| \geq \sqrt{2 \ln \frac{1}{\delta}}\right] \leq \delta.$$

## References

- Angluin, D. and Valiant, L.G. Fast probabilistic algorithms for hamiltonian circuits and matchings. *Journal of Computer and System Sciences*, 18(2):155–193, 1979.
- Chang, Seok-Ho, Cosman, Pamela C., and Milstein, Laurence B. Chernoff-type bounds for the gaussian error function. *IEEE Transactions on Communications*, 59(11):2939–2944, 2011.
- Laurent, B. and Massart, P. Adaptive estimation of a quadratic functional by model selection. *The Annals of Statistics*, 28(5):1302–1338, 2000.
- Smale, Steve and Zhou, Ding-Xuan. Learning theory estimates via integral operators and their approximations. *Constructive Approximation*, 26(2):153–172, 2007.
